# Supplementary material for: Microelectrode Array based Functional Testing of Pancreatic Islet Cells
Source: Micromachines (Basel). 2020 May 17;11(5):507. doi: 10.3390/mi11050507 (PMC7281363; doi:10.3390/mi11050507)
Supplement: Supplementary file 1 [file micromachines-11-00507-s001.pdf]

# Supplementary Information: Microelectrode Array based Functional Testing of Pancreatic Islet Cells

Ahmad Alassaf <sup>1,2,3</sup>, Matthew Ishahak <sup>1,2</sup>, Annie Bowles <sup>1,2</sup> and Ashutosh Agarwal <sup>1,2,\*</sup>

<sup>1</sup> Department of Biomedical Engineering, University of Miami, Coral Gables, FL 33146, USA;

a.alassaf@umiami.edu (A.A.); m.ishahak@umiami.edu (M.I.); abowles6@gatech.edu (A.B.)

<sup>2</sup> DJTMF Biomedical Nanotechnology Institute, University of Miami, Miami, FL 33136, USA

<sup>3</sup> Department of Medical Equipment Technology, Majmaah University, Al Majmaah 11952, Saudi Arabia

\* Correspondence: A.agarwal2@miami.edu; Tel.: 305-243-8925

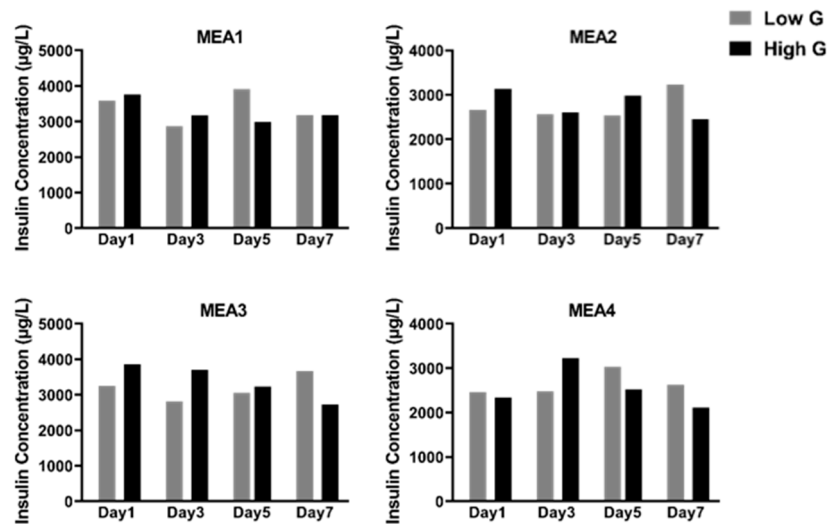

**Figure S1.** Glucose stimulated insulin secretion for functional assessments. Insulin concentration by dissociated islets on each MEA under low (1.1 mM) and high (16.7 mM) glucose media for the different culture days.

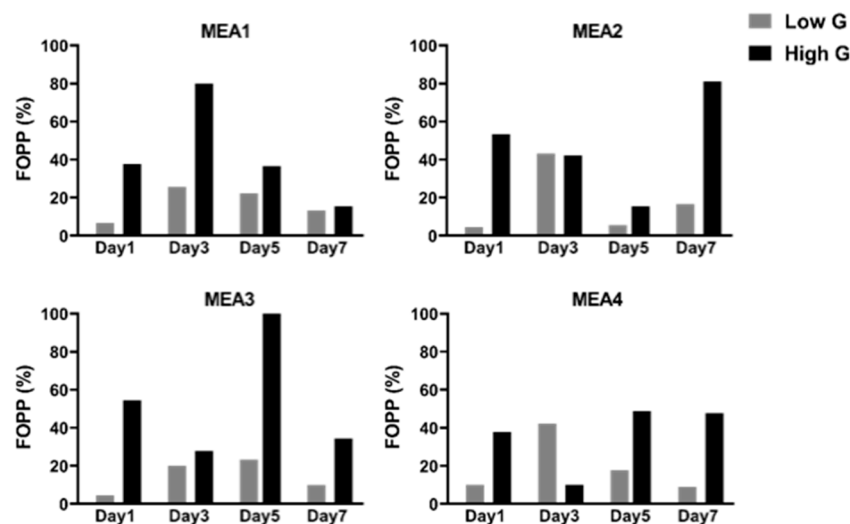

**Figure S2.** Assessment of FOPP. Quantification of FOPP of each MEA for low (1.1 mM) and high (16.7 mM) glucose media for the different culture days.
